# Supplementary material for: Spark Plasma Sintering of Lithium Aluminum Germanium Phosphate Solid Electrolyte and its Electrochemical Properties
Source: MDPI journal article supplement (doi:10.3390/nano9081086), 2019-07-29
Supplement: s1 [file s1]

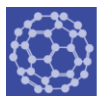

## Supplementary Materials

# Spark Plasma Sintering of Lithium Aluminum Germanium Phosphate Solid Electrolyte and its Electrochemical Properties

Hongzheng Zhu, Anil Prasad, Somi Doja, Lukas Bichler and Jian Liu \*

School of Engineering, Faculty of Applied Science, The University of British Columbia, Kelowna, BC V1V 1V7 Canada

\* Correspondence: Jian.liu@ubc.ca

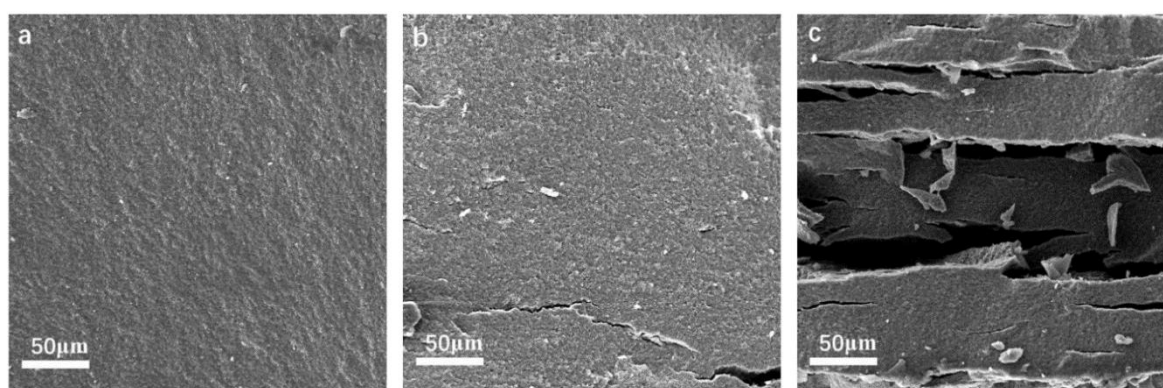

**Figure S1.** Low-magnification SEM images of SPS pellets sintered for 2 min at different temperatures of (a) 650 °C, (b) 700 °C, and (c) 750 °C.
